# Supplementary material
Source: MDPI journal article supplement (https://www.mdpi.com/2073-4395/14/1/64)
Supplement: s1 [file s1]

**Table S1.** Effect of root and foliar humic substances application on N, IE, PFP, and NE.

|                     | N<br>(mg g <sup>-1</sup> DW) | IE<br>(g g <sup>-1</sup> ) | PFP<br>(g g <sup>-1</sup> ) | NE<br>(mg)       |
|---------------------|------------------------------|----------------------------|-----------------------------|------------------|
| Control             | 51.75 ± 0.30d                | 2.23 ± 0.22bcd             | 354.67 ± 8.75c              | 115.70 ± 12.15cd |
| R1                  | 54.25 ± 0.14a                | 2.25 ± 0.11bcd             | 409.66 ± 18.55a             | 122.10 ± 6.27cd  |
| R2                  | 52.35 ± 0.27c                | 2.65 ± 0.01bc              | 415.32 ± 13.95a             | 138.72 ± 1.01bc  |
| R3                  | 53.99 ± 0.22ab               | 3.95 ± 0.48a               | 436.92 ± 12.78a             | 189.86 ± 13.20a  |
| R4                  | 51.95 ± 0.08cd               | 2.00 ± 0.15d               | 327.88 ± 14.74c             | 103.76 ± 8.06d   |
| F1                  | 53.48 ± 0.11b                | 2.78 ± 0.04b               | 363.09 ± 12.11bc            | 148.40 ± 2.61b   |
| F2                  | 50.44 ± 0.05e                | 2.55 ± 0.12bcd             | 138.72 ± 1.01ab             | 128.48 ± 6.34bcd |
| F3                  | 50.34 ± 0.17e                | 2.72 ± 0.22bc              | 189.86 ± 13.20ab            | 136.81 ± 11.35bc |
| F4                  | 52.43 ± 0.20c                | 2.12 ± 0.11cd              | 103.76 ± 8.06c              | 111.02 ± 6.16d   |
| <i>p</i> -value     | ***                          | ***                        | ***                         | ***              |
| LSD <sub>0.05</sub> | 0.57                         | 0.62                       | 38.76                       | 25.07            |

Abbreviations: N: nitrogen; IE: internal utilization efficiency of a nutrient; PFP: partial factor productivity of applied nutrient; NE: nutrient export of applied nutrient in shoot. All data values represent means ± standard error (n=3). The levels of significance were represented as NS ( $p > 0.05$ ), \* ( $p < 0.05$ ), \*\*\* ( $p < 0.001$ ). Values with different letters indicate significant differences.

**Table S2.** Effect of root and foliar humic substances application on P, IE, PFP, and NE.

|                     | P<br>(mg g <sup>-1</sup> DW) | IE<br>(g g <sup>-1</sup> ) | PFP<br>(g g <sup>-1</sup> ) | NE<br>(mg)     |
|---------------------|------------------------------|----------------------------|-----------------------------|----------------|
| Control             | 3.94 ± 0.05ab                | 0.254 ± 0.004cd            | 533.91 ± 13.17c             | 8.82 ± 0.99bcd |
| R1                  | 3.93 ± 0.04ab                | 0.255 ± 0.002cd            | 616.69 ± 27.93a             | 8.83 ± 0.38bcd |
| R2                  | 3.72 ± 0.02c                 | 0.267 ± 0.001ab            | 625.21 ± 21.00a             | 9.86 ± 0.07bc  |
| R3                  | 3.83 ± 0.06bc                | 0.261 ± 0.004bc            | 657.72 ± 19.25a             | 15.11 ± 1.80a  |
| R4                  | 3.71 ± 0.04c                 | 0.270 ± 0.003a             | 493.59 ± 22.19c             | 7.41 ± 0.53d   |
| F1                  | 3.86 ± 0.01b                 | 0.259 ± 0.001c             | 546.59 ± 18.23bc            | 10.72 ± 0.19bc |
| F2                  | 3.87 ± 0.05b                 | 0.258 ± 0.003c             | 602.92 ± 6.71ab             | 9.84 ± 0.34bc  |
| F3                  | 4.02 ± 0.02a                 | 0.249 ± 0.001d             | 601.13 ± 24.29ab            | 10.94 ± 0.94b  |
| F4                  | 4.01 ± 0.02a                 | 0.249 ± 0.001d             | 519.98 ± 13.64c             | 8.49 ± 0.45cd  |
| <i>p</i> -value     | ***                          | ***                        | ***                         | ***            |
| LSD <sub>0.05</sub> | 0.12                         | 0.008                      | 58.35                       | 2.40           |

Abbreviations: P: phosphorus; IE: internal utilization efficiency of a nutrient; PFP: partial factor productivity of applied nutrient; NE: nutrient export of applied nutrient in shoot. All data values represent means ± standard error (n=3). The levels of significance were represented as NS ( $p > 0.05$ ), \* ( $p < 0.05$ ), \*\*\* ( $p < 0.001$ ). Values with different letters indicate significant differences.

**Table S3.** Effect of root and foliar humic substances application on K, IE, PFP, and NE.

|                     | K<br>(mg g <sup>-1</sup> DW) | IE<br>(g g <sup>-1</sup> ) | PFP<br>(g g <sup>-1</sup> ) | NE<br>(mg)      |
|---------------------|------------------------------|----------------------------|-----------------------------|-----------------|
| Control             | 30.62 ± 0.33c                | 0.0327 ± 0.0004bc          | 169.47 ± 4.18c              | 68.51 ± 7.36c   |
| R1                  | 31.24 ± 0.58bc               | 0.0320 ± 0.0006bcd         | 195.74 ± 8.67a              | 70.21 ± 2.73c   |
| R2                  | 30.34 ± 0.26c                | 0.0330 ± 0.0003b           | 198.44 ± 6.66a              | 80.39 ± 0.85bc  |
| R3                  | 35.58 ± 0.57a                | 0.0281 ± 0.0004e           | 208.77 ± 6.11a              | 140.35 ± 16.38a |
| R4                  | 31.75 ± 0.57b                | 0.0315 ± 0.0004d           | 156.67 ± 7.04c              | 63.30 ± 4.23c   |
| F1                  | 34.77 ± 0.32a                | 0.0288 ± 0.0003e           | 173.49 ± 5.79bc             | 96.47 ± 1.01b   |
| F2                  | 28.99 ± 0.08d                | 0.0345 ± 0.0001a           | 191.37 ± 2.13ab             | 73.81 ± 3.41c   |
| F3                  | 30.60 ± 0.26c                | 0.0327 ± 0.0003bc          | 190.80 ± 7.71ab             | 83.25 ± 7.35bc  |
| F4                  | 31.33 ± 0.10bc               | 0.0319 ± 0.0001cd          | 165.05 ± 4.33c              | 66.32 ± 3.56c   |
| <i>p</i> -value     | ***                          | ***                        | ***                         | ***             |
| LSD <sub>0.05</sub> | 1.08                         | 0.0010                     | 18.52                       | 20.49           |

Abbreviations: K: potassium; IE: internal utilization efficiency of a nutrient; PFP: partial factor productivity of applied nutrient; NE: nutrient export of applied nutrient in shoot. All data values represent means ± standard error (n=3). The levels of significance were represented as NS ( $p > 0.05$ ), \* ( $p < 0.05$ ), \*\*\* ( $p < 0.001$ ). Values with different letters indicate significant differences.
